# Supplementary material for: Predicting mortality after transcatheter aortic valve replacement using preprocedural CT
Source: PubMed Central journal article supplement (PMC11143216; doi:10.1038/s41598-024-63022-x), 2024-05-31
Supplement: 41598_2024_63022_MOESM1_ESM.pdf [file 41598_2024_63022_MOESM1_ESM.pdf]

# Predicting Mortality after Transcatheter Aortic Valve Replacement using Preprocedural CT: Supplementary Material

## Marginalization for Binary Data

This case pertains to missing entries in the binary variables of  $A$ . In this case, marginalization involves summation over possible alternatives. As we only encounter binary variables, this simply entails summing over the cases when the missing variables are either 0 or 1. Note that this amounts to  $2^k$  cases to sum over in case  $k$  binary variables are missing for a given instance. For an observation  $n$  the joint probability can be written as

$$p(A_n^{(\setminus k)}, f(I_n; \omega), J_n, Y_n) = p(A_n^{(\setminus k)})p(J_n|f(I_n; w)) \sum_{\mathcal{A}^{(k)}} \left( p(A^{(k)})p(f(I_n; w)|A_n^{(\setminus k)}, A^{(k)})p(Y_n|f(I_n; w), A_n^{(\setminus k)}, A^{(k)}) \right), \quad (1)$$

where the superscript  $(\setminus k)$  denotes non-missing dimensions and  $(k)$  denotes the missing dimensions.  $\mathcal{A}^{(k)}$  are the sets of possible values for the missing dimensions. Since we have binary variables we sum over all possible binary codes of length  $k$ .

As we train our network via log-likelihood maximization, the objective to maximize is:

$$\ln p(A_n^{(\setminus k)}, f(I_n; \omega), J_n, Y_n) = \ln p(A_n^{(\setminus k)}) + \ln p(J_n|f(I_n; w)) + \ln \sum_{\mathcal{A}^{(k)}} \left( p(A^{(k)})p(f(I_n; w)|A_n^{(\setminus k)}, A^{(k)})p(Y_n|f(I_n; w), A_n^{(\setminus k)}, A^{(k)}) \right) \quad (2)$$

To avoid under- or overflow during loss computation, we use a numerically stable implementation of log-sum-exp to compute the last term. If some continuous variables are missing as well, the expressions derived in the next section can be combined with Eq. (2).

## Marginalization for Continuous Data

There are three possible subcases: Missing data in  $A$ , missing image  $I$ , and both of the above. For brevity, we only provide the full derivation for the case of missing data in  $A$ , and directly write the log-likelihood for the other two cases. Since the derivations are similar, the following derivation can be used as a prototype for the other two cases.

### Missing Data in $A$

This is the case when image  $I$  is given but some entries in  $A$  are missing. We can write the joint probability as

$$p(A^{(\setminus k)}, f(I; \omega), J, Y) = p(A^{(\setminus k)})p(J|f(I; w)) \int p(A^{(k)})p(f(I; w)|A^{(\setminus k)}, A^{(k)})p(Y|f(I; w), A^{(\setminus k)}, A^{(k)})dA^{(k)}, \quad (3)$$

where the superscript  $(\setminus k)$  denotes non-missing dimensions and  $(k)$  denotes missing dimensions in  $A$ . As we will see, we only need to derive the result for the case  $Y = 1$ . Observe that

$$\begin{aligned} p(Y = 1|f(I; w), A) &= \sigma(\alpha_I^T (f(I; \omega) - \beta^T A) + \alpha_A^T A + b_Y) \\ &= \sigma((\alpha_A - \beta \alpha_I)^T A + \alpha_I^T f(I; \omega) + b_Y). \end{aligned} \quad (4)$$

We split  $(\alpha_A - \beta \alpha_I) = \begin{bmatrix} \gamma^{(\setminus k)} \\ \gamma^{(k)} \end{bmatrix}$ , where  $\gamma^{(\setminus k)}$  multiplies non-missing dimensions in  $A$  and  $\gamma^{(k)}$  multiplies missing dimensions. As a result we obtain

$$\begin{aligned} p(Y = 1|f(I; w), A^{(\setminus k)}, A^{(k)}) &= \sigma(\gamma^{(k)T} A^{(k)} + \gamma^{(\setminus k)T} A^{(\setminus k)} + \alpha_I^T f(I; \omega) + b_Y) \\ &= \int \sigma(\xi) \delta(\xi - (\gamma^{(k)T} A^{(k)} + \gamma^{(\setminus k)T} A^{(\setminus k)} + \alpha_I^T f(I; \omega) + b_Y)) d\xi, \end{aligned} \quad (5)$$

where we introduce a new variable  $\xi$  in the second line by making use of Dirac's delta  $\delta(\cdot)$ . We do the same for

$$\begin{aligned} p(f(I; w)|A^{(\setminus k)}, A^{(k)}) &= \mathcal{N}(f(I; \omega); \beta^{(k)T} A^{(k)} + \beta^{(\setminus k)T} A^{(\setminus k)}, \sigma_I^2 \mathbf{I}_I) \\ &= \int \mathcal{N}(f(I; \omega); \eta, \sigma_I^2 \mathbf{I}_I) \delta(\eta - (\beta^{(k)T} A^{(k)} + \beta^{(\setminus k)T} A^{(\setminus k)})) d\eta, \end{aligned} \quad (6)$$

where we split  $\beta = \begin{bmatrix} \beta^{(\setminus k)} \\ \beta^{(k)} \end{bmatrix}$  and we introduced the new variable  $\eta$ . Going back to Eq. (3), we can now write out the integral on the right-hand side by plugging in Eq. (5) and Eq. (6) and changing the order of integration.

$$\int \sigma(\xi) \int \mathcal{N}(f(I; \omega); \eta, \sigma_I^2 \mathbf{I}_I) \int \mathcal{N}(A^{(k)}; \mu_{A^{(k)}}, \sigma_{A^{(k)}}^2 \mathbf{I}_{A^{(k)}}) \delta\left(\eta - \left(\beta^{(k)T} A^{(k)} + \beta^{(\setminus k)T} A^{(\setminus k)}\right)\right) \delta\left(\xi - \left(\gamma^{(k)T} A^{(k)} + \gamma^{(\setminus k)T} A^{(\setminus k)} + \alpha_I^T f(I; \omega) + b_Y\right)\right) dA^{(k)} d\eta d\xi \quad (7)$$

Observe that the innermost integral yields another Gaussian distribution: The Dirac's delta terms constrain  $A^{(k)}$  to a linear subspace. The integral consequently integrates over all directions within the subspace, yielding a marginal distribution over the directions orthogonal to it. We know that the marginal of a Gaussian is another Gaussian, whose mean and variance we can determine by computing its first and second moments.

$$p\left(\xi, \eta | f(I; \omega), A^{(\setminus k)}\right) = \mathcal{N}\left(\begin{bmatrix} \xi \\ \eta \end{bmatrix}; \begin{bmatrix} \mu_{\xi|f(I; \omega), A^{(\setminus k)}} \\ \mu_{\eta|f(I; \omega), A^{(\setminus k)}} \end{bmatrix}, \begin{bmatrix} \Sigma_{\xi|f(I; \omega), A^{(\setminus k)}} & \Sigma_{\xi, \eta|f(I; \omega), A^{(\setminus k)}} \\ \Sigma_{\eta, \xi|f(I; \omega), A^{(\setminus k)}} & \Sigma_{\eta|f(I; \omega), A^{(\setminus k)}} \end{bmatrix}\right) \quad (8)$$

$$\mu_{\xi|f(I; \omega), A^{(\setminus k)}} = \gamma^{(k)T} \mu_{A^{(k)}} + \gamma^{(\setminus k)T} A^{(\setminus k)} + \alpha_I^T f(I; \omega) + b_Y \quad (9)$$

$$\mu_{\eta|f(I; \omega), A^{(\setminus k)}} = \beta^{(k)T} \mu_{A^{(k)}} + \beta^{(\setminus k)T} A^{(\setminus k)} \quad (10)$$

$$\Sigma_{\xi|f(I; \omega), A^{(\setminus k)}} = \gamma^{(k)T} \sigma_{A^{(k)}}^2 \mathbf{I}_{A^{(k)}} \gamma^{(k)} \quad (11)$$

$$\Sigma_{\xi, \eta|f(I; \omega), A^{(\setminus k)}} = \gamma^{(k)T} \sigma_{A^{(k)}}^2 \mathbf{I}_{A^{(k)}} \beta^{(k)} \quad (12)$$

$$\Sigma_{\eta, \xi|f(I; \omega), A^{(\setminus k)}} = \beta^{(k)T} \sigma_{A^{(k)}}^2 \mathbf{I}_{A^{(k)}} \gamma^{(k)} \quad (13)$$

$$\Sigma_{\eta|f(I; \omega), A^{(\setminus k)}} = \beta^{(k)T} \sigma_{A^{(k)}}^2 \mathbf{I}_{A^{(k)}} \beta^{(k)} \quad (14)$$

Note that we can back-substitute  $\gamma$  and  $\beta$  by defining  $\mu_{A'} = \begin{bmatrix} A^{(\setminus k)} \\ \mu_{A^{(k)}} \end{bmatrix}$  and  $\Sigma_{A'} = \begin{bmatrix} \mathbf{0}_{A^{(\setminus k)}} & \mathbf{0}_{A^{(\setminus k)}, A^{(k)}} \\ \mathbf{0}_{A^{(k)}, A^{(\setminus k)}} & \sigma_{A^{(k)}}^2 \mathbf{I}_{A^{(k)}} \end{bmatrix}$ . In other words, we can treat non-missing features in  $A$  analogous to the missing features, setting the mean equal to their actual value and the standard deviation to zero.

$$\mu_{\xi|f(I; \omega), A^{(\setminus k)}} = \gamma^T \mu_{A'} + \alpha_I^T f(I; \omega) + b_Y \quad (15)$$

$$\mu_{\eta|f(I; \omega), A^{(\setminus k)}} = \beta^T \mu_{A'} \quad (16)$$

$$\Sigma_{\xi|f(I; \omega), A^{(\setminus k)}} = \gamma^T \Sigma_{A'} \gamma \quad (17)$$

$$\Sigma_{\xi, \eta|f(I; \omega), A^{(\setminus k)}} = \gamma^T \Sigma_{A'} \beta \quad (18)$$

$$\Sigma_{\eta, \xi|f(I; \omega), A^{(\setminus k)}} = \beta^T \Sigma_{A'} \gamma \quad (19)$$

$$\Sigma_{\eta|f(I; \omega), A^{(\setminus k)}} = \beta^T \Sigma_{A'} \beta \quad (20)$$

Note that  $p(\eta | f(I; \omega), A^{(\setminus k)}) = p(\eta | A^{(\setminus k)})$ . Moving on to the middle integral in Eq. (7), we observe that it is a convolution of Gaussians. To compute it, we first compute the joint distribution by refactoring the terms multiple times:

$$\int p(f(I; \omega) | \eta) p(\xi, \eta | f(I; \omega), A^{(\setminus k)}) d\eta = \int p(f(I; \omega) | \eta) p(\xi | \eta, f(I; \omega), A^{(\setminus k)}) p(\eta | A^{(\setminus k)}) d\eta \quad (21)$$

$$= \int p(\xi, f(I; \omega) | \eta, A^{(\setminus k)}) p(\eta | A^{(\setminus k)}) d\eta \quad (22)$$

$$= \int p(\xi, f(I; \omega), \eta | A^{(\setminus k)}) d\eta \quad (23)$$

In each refactoring step, we can use the general equations for the conditional distribution of a Gaussian distribution (e.g., see Eq. (2.81) and (2.82) in Bishop<sup>1</sup>) to read out the joint or conditionals. According to Eq. (21) we first factorize Eq. (8).

$$\begin{aligned}
p(\xi, \eta | f(I; \omega), A^{(\backslash k)}) &= p(\xi | \eta, f(I; \omega), A^{(\backslash k)}) p(\eta | A^{(\backslash k)}) \\
&= \mathcal{N} \left( \xi; \mu_{\xi | \eta, f(I; \omega), A^{(\backslash k)}}, \Sigma_{\xi | \eta, f(I; \omega), A^{(\backslash k)}} \right) \mathcal{N} \left( \eta; \beta^T \mu_{A'}, \beta^T \Sigma_{A'} \beta \right)
\end{aligned} \tag{24}$$

$$\mu_{\xi | \eta, f(I; \omega), A^{(\backslash k)}} = \gamma^T \mu_{A'} + \alpha_I^T f(I; \omega) + b_Y + \gamma^T \Sigma_{A'} \beta \left( \beta^T \Sigma_{A'} \beta \right)^{-1} (\eta - \beta^T \mu_{A'}) \tag{25}$$

$$\Sigma_{\xi | \eta, f(I; \omega), A^{(\backslash k)}} = \gamma^T \Sigma_{A'} \gamma - \gamma^T \Sigma_{A'} \beta \left( \beta^T \Sigma_{A'} \beta \right)^{-1} \beta^T \Sigma_{A'} \gamma \tag{26}$$

Next, we compute  $p(\xi, f(I; \omega) | \eta, A^{(\backslash k)})$  in Eq. (22).

$$p(\xi, f(I; \omega) | \eta, A^{(\backslash k)}) = \mathcal{N} \left( \begin{bmatrix} \xi \\ f(I; \omega) \end{bmatrix}; \begin{bmatrix} \mu_{\xi | \eta, A^{(\backslash k)}} \\ \mu_{f(I; \omega) | \eta, A^{(\backslash k)}} \end{bmatrix}, \begin{bmatrix} \Sigma_{\xi | \eta, A^{(\backslash k)}} & \Sigma_{\xi, f(I; \omega) | \eta, A^{(\backslash k)}} \\ \Sigma_{f(I; \omega), \xi | \eta, A^{(\backslash k)}} & \Sigma_{f(I; \omega) | \eta, A^{(\backslash k)}} \end{bmatrix} \right) \tag{27}$$

$$\mu_{\xi | \eta, A^{(\backslash k)}} = \left( \gamma^T - \gamma^T \Sigma_{A'} \beta \left( \beta^T \Sigma_{A'} \beta \right)^{-1} \beta^T \right) \mu_{A'} + b_Y + \left( \alpha_I^T + \gamma^T \Sigma_{A'} \beta \left( \beta^T \Sigma_{A'} \beta \right)^{-1} \right) \eta \tag{28}$$

$$\mu_{f(I; \omega) | \eta, A^{(\backslash k)}} = \eta \tag{29}$$

$$\Sigma_{\xi | \eta, A^{(\backslash k)}} = \gamma^T \Sigma_{A'} \gamma - \gamma^T \Sigma_{A'} \beta \left( \beta^T \Sigma_{A'} \beta \right)^{-1} \beta^T \Sigma_{A'} \gamma + \sigma_I^2 \alpha_I^T \alpha_I \tag{30}$$

$$\Sigma_{\xi, f(I; \omega) | \eta, A^{(\backslash k)}} = \sigma_I^2 \alpha_I^T \tag{31}$$

$$\Sigma_{f(I; \omega), \xi | \eta, A^{(\backslash k)}} = \sigma_I^2 \alpha_I \tag{32}$$

$$\Sigma_{f(I; \omega) | \eta, A^{(\backslash k)}} = \sigma_I^2 \mathbf{I}_I \tag{33}$$

Finally, we substitute  $\xi' = \begin{bmatrix} \xi \\ f(I; \omega) \end{bmatrix}$  and compute the joint distribution  $p(\xi', \eta | A^{(\backslash k)})$  in Eq. (23).

$$p(\xi', \eta | A^{(\backslash k)}) = \mathcal{N} \left( \begin{bmatrix} \xi' \\ \eta \end{bmatrix}; \begin{bmatrix} \mu_{\xi' | A^{(\backslash k)}} \\ \mu_{\eta | A^{(\backslash k)}} \end{bmatrix}, \begin{bmatrix} \Sigma_{\xi' | A^{(\backslash k)}} & \Sigma_{\xi', \eta | A^{(\backslash k)}} \\ \Sigma_{\eta, \xi' | A^{(\backslash k)}} & \Sigma_{\eta | A^{(\backslash k)}} \end{bmatrix} \right) \tag{34}$$

$$\mu_{\xi' | A^{(\backslash k)}} = \begin{bmatrix} (\alpha_I^T \beta^T + \gamma^T) \mu_{A'} + b_Y \\ \beta^T \mu_{A'} \end{bmatrix} \tag{35}$$

$$\mu_{\eta | A^{(\backslash k)}} = \beta^T \mu_{A'} \tag{36}$$

$$\Sigma_{\xi' | A^{(\backslash k)}} = \begin{bmatrix} (\alpha_I^T \beta^T + \gamma^T) \Sigma_{A'} \beta \alpha_I + (\alpha_I^T \beta^T + \gamma^T) \Sigma_{A'} \gamma + \sigma_I^2 \alpha_I^T \alpha_I & (\alpha_I^T \beta^T + \gamma^T) \Sigma_{A'} \beta + \sigma_I^2 \alpha_I^T \\ \beta^T \Sigma_{A'} (\beta \alpha_I + \gamma) + \sigma_I^2 \alpha_I & \beta^T \Sigma_{A'} \beta + \sigma_I^2 \mathbf{I}_I \end{bmatrix} \tag{37}$$

$$\Sigma_{\xi', \eta | A^{(\backslash k)}} = \begin{bmatrix} (\alpha_I^T \beta^T + \gamma^T) \Sigma_{A'} \beta \\ \beta^T \Sigma_{A'} \beta \end{bmatrix} \tag{38}$$

$$\Sigma_{\eta, \xi' | A^{(\backslash k)}} = \begin{bmatrix} \beta^T \Sigma_{A'} (\beta \alpha_I + \gamma) & \beta^T \Sigma_{A'} \beta \end{bmatrix} \tag{39}$$

$$\Sigma_{\eta | A^{(\backslash k)}} = \beta^T \Sigma_{A'} \beta \tag{40}$$

We can thus determine the middle integral in Eq. (7) by reading out the marginal

$$p(\xi, f(I; \omega) | A^{(\backslash k)}) = \mathcal{N} \left( \begin{bmatrix} \xi \\ f(I; \omega) \end{bmatrix}; \mu_{\xi' | A^{(\backslash k)}}, \Sigma_{\xi' | A^{(\backslash k)}} \right). \tag{41}$$

The outer integral in Eq. (7) takes the form

$$\int \sigma(\xi) p(\xi, f(I; \omega) | A^{(\backslash k)}) d\xi = p(f(I; \omega) | A^{(\backslash k)}) \int \sigma(\xi) p(\xi | f(I; \omega), A^{(\backslash k)}) d\xi, \tag{42}$$

where we again factorize the joint distribution using the expressions for the conditional distribution of a Gaussian:

$$p\left(f(I; \omega) | A^{(\backslash k)}\right) = \mathcal{N}\left(f(I; \omega); \beta^T \mu_{A'}, \beta^T \Sigma_{A'} \beta + \sigma_I^2 \mathbf{I}_I\right) \quad (43)$$

$$p\left(\xi | f(I; \omega), A^{(\backslash k)}\right) = \mathcal{N}\left(\xi; \mu'_{\setminus A^{(k)}}, \sigma_{\setminus A^{(k)}}^2\right) \quad (44)$$

$$\mu'_{\setminus A^{(k)}} = (\alpha_I^T \beta^T + \gamma^T) \mu_{A'} + b_Y + ((\alpha_I^T \beta^T + \gamma^T) \Sigma_{A'} \beta + \sigma_I^2 \alpha_I^T) (\beta^T \Sigma_{A'} \beta + \sigma_I^2 \mathbf{I}_I)^{-1} (f(I; \omega) - \beta^T \mu_{A'}) \quad (45)$$

$$\begin{aligned} \sigma_{\setminus A^{(k)}}^2 &= (\alpha_I^T \beta^T + \gamma^T) \Sigma_{A'} \beta \alpha_I + (\alpha_I^T \beta^T + \gamma^T) \Sigma_{A'} \gamma + \sigma_I^2 \alpha_I^T \alpha_I \\ &\quad - ((\alpha_I^T \beta^T + \gamma^T) \Sigma_{A'} \beta + \sigma_I^2 \alpha_I^T) (\beta^T \Sigma_{A'} \beta + \sigma_I^2 \mathbf{I}_I)^{-1} (\beta^T \Sigma_{A'} (\beta \alpha_I + \gamma) + \sigma_I^2 \alpha_I) \end{aligned} \quad (46)$$

The integral on the right-hand side of Eq. (42) is the convolution of a Gaussian with a logistic sigmoid. To obtain an analytical expression, we approximate the sigmoid function  $\sigma(\xi)$  with a scaled inverse probit function  $\Phi\left(\sqrt{\frac{\pi}{8}} \xi\right)$ <sup>1</sup>.

$$\int \sigma(\xi) \mathcal{N}\left(\xi; \mu'_{\setminus A^{(k)}}, \sigma_{\setminus A^{(k)}}^2\right) d\xi \approx \int \Phi\left(\sqrt{\frac{\pi}{8}} \xi\right) \mathcal{N}\left(\xi; \mu'_{\setminus A^{(k)}}, \sigma_{\setminus A^{(k)}}^2\right) d\xi = \Phi\left(\frac{\sqrt{\frac{\pi}{8}} \mu'_{\setminus A^{(k)}}}{\sqrt{1 + \frac{\pi}{8} \sigma_{\setminus A^{(k)}}^2}}\right) \approx \sigma\left(\frac{\mu'_{\setminus A^{(k)}}}{\sqrt{1 + \frac{\pi}{8} \sigma_{\setminus A^{(k)}}^2}}\right) \quad (47)$$

We can now write out the full log-likelihood for one observation  $n$ . Note that we back-substituted  $(\alpha_A - \beta \alpha_I) = \gamma$  into all equations.

$$\begin{aligned} \ln p(A_n^{(\backslash k)}, J_n, f(I_n; \omega), Y_n) &= \ln \int p(A_n^{(\backslash k)}, A^{(k)}, J_n, f(I_n; \omega), Y_n) dA^{(k)} \\ &= \ln p(J_n | f(I_n; \omega)) + \ln p(A_n^{(\backslash k)}) + \ln \mu_{n, \setminus A^{(k)}}^{Y_n} (1 - \mu_{n, \setminus A^{(k)}})^{1 - Y_n} \\ &\quad + \ln \mathcal{N}\left(f(I_n; \omega); \beta^T \mu_{A'}, \beta^T \Sigma_{A'} \beta + \sigma_I^2 \mathbf{I}_I\right) \end{aligned} \quad (48)$$

$$\mu_{n, \setminus A^{(k)}} = \sigma\left(\frac{\mu'_{n, \setminus A^{(k)}}}{\sqrt{1 + \frac{\pi}{8} \sigma_{n, \setminus A^{(k)}}^2}}\right) \quad (49)$$

$$\mu'_{n, \setminus A^{(k)}} = \alpha_A^T \mu_{A'} + b_Y + (\alpha_A^T \Sigma_{A'} \beta + \sigma_I^2 \alpha_I^T) (\beta^T \Sigma_{A'} \beta + \sigma_I^2 \mathbf{I}_I)^{-1} (f(I; \omega) - \beta^T \mu_{A'}) \quad (50)$$

$$\sigma_{n, \setminus A^{(k)}}^2 = \alpha_A^T \Sigma_{A'} \alpha_A + \sigma_I^2 \alpha_I^T \alpha_I - (\alpha_A^T \Sigma_{A'} \beta + \sigma_I^2 \alpha_I^T) (\beta^T \Sigma_{A'} \beta + \sigma_I^2 \mathbf{I}_I)^{-1} (\beta^T \Sigma_{A'} \alpha_A + \sigma_I^2 \alpha_I) \quad (51)$$

where, as defined earlier,  $\mu_{A'} = \begin{bmatrix} A_n^{(\backslash k)} \\ \mu_{A^{(k)}} \end{bmatrix}$  and  $\Sigma_{A'} = \begin{bmatrix} \mathbf{0}_{A^{(\backslash k)}} & \mathbf{0}_{A^{(\backslash k)}, A^{(k)}} \\ \mathbf{0}_{A^{(k)}, A^{(\backslash k)}} & \sigma_{A^{(k)}}^2 \mathbf{I}_{A^{(k)}} \end{bmatrix}$ .

### Missing Image I

This is the case when image  $I$  is missing and  $A$  is complete. We provide directly the log-likelihood for one observation  $n$ .

$$\begin{aligned} \ln p(A_n, J_n, Y_n) &= \ln \int p(A_n, J_n, f(I; \omega), Y_n) dI \\ &= \ln p(A_n) + \ln \mu_{n, \setminus I}^{Y_n} (1 - \mu_{n, \setminus I})^{1 - Y_n} + \ln \mathcal{N}\left(J_n; \phi^T \beta^T A, \sigma_I^2 \phi^T \phi + \sigma_J^2 \mathbf{I}_J\right) \end{aligned} \quad (52)$$

$$\mu_{n, \setminus I} = \sigma\left(\frac{\mu'_{n, \setminus I}}{\sqrt{1 + \frac{\pi}{8} \sigma_{n, \setminus I}^2}}\right) \quad (53)$$

$$\mu'_{n, \setminus I} = \alpha_A^T A + b_Y + \sigma_I^2 \alpha_I^T \phi (\sigma_I^2 \phi^T \phi + \sigma_J^2 \mathbf{I}_J)^{-1} (J_n - \phi^T \beta^T A) \quad (54)$$

$$\sigma_{n, \setminus I}^2 = \sigma_I^2 \alpha_I^T \alpha_I - \sigma_I^4 \alpha_I^T \phi (\sigma_I^2 \phi^T \phi + \sigma_J^2 \mathbf{I}_J)^{-1} \phi^T \alpha_I \quad (55)$$

Fig. 1 shows the shifted dependency structure caused by the marginalization of  $I$ .

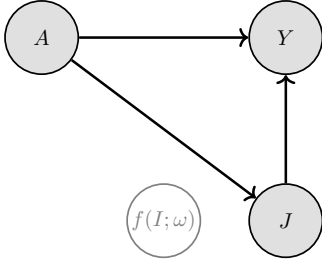

**Figure 1.** Directed acyclic graph expressing the conditional dependence structure for samples with a missing image  $I$ .  $A$  are the tabular characteristics,  $f(I; \omega)$  are automatically extracted image features,  $J$  are manual image measurements, and  $Y$  is the outcome. Arrows indicate a dependency, e.g.,  $J$  only depends on  $A$ . By marginalizing over  $f(I; \omega)$ , a causal link between  $J$  and  $Y$  is formed.

### Missing Data in $A$ and Missing Image $I$

Finally, the case when both the image  $I$  and some variables in  $A$  are missing. Again we provide the log-likelihood.

$$\begin{aligned} \ln p(A_n^{(\setminus k)}, J_n, Y_n) &= \ln \int \int p(A_n^{(\setminus k)}, A^{(k)}, J_n, f(I_n; \omega), Y_n) dA^{(k)} dI \\ &= \ln p(A_n^{(\setminus k)}) + \ln \mu_{n, \setminus A^{(k)}, \setminus I}^{Y_n} (1 - \mu_{n, \setminus A^{(k)}, \setminus I})^{1 - Y_n} + \ln \mathcal{N}(J_n; \phi^T \beta^T \mu_{A'}, \phi^T (\beta^T \Sigma_{A'} \beta + \sigma_I^2 \mathbf{I}_I) \phi + \sigma_J^2 \mathbf{I}_J) \end{aligned} \quad (56)$$

$$\mu_{n, \setminus A^{(k)}, \setminus I} = \sigma \left( \frac{\mu'_{n, \setminus A^{(k)}, \setminus I}}{\sqrt{1 + \frac{\pi}{8} \sigma_{n, \setminus A^{(k)}, \setminus I}^2}} \right) \quad (57)$$

$$\mu'_{n, \setminus A^{(k)}, \setminus I} = \alpha_A^T \mu_{A'} + b_Y + (\alpha_A^T \Sigma_{A'} \beta + \sigma_I^2 \alpha_I^T) \phi (\phi^T (\beta^T \Sigma_{A'} \beta + \sigma_I^2 \mathbf{I}_I) \phi + \sigma_J^2 \mathbf{I}_J)^{-1} (J_n - \phi^T \beta^T \mu_{A'}) \quad (58)$$

$$\begin{aligned} \sigma_{n, \setminus A^{(k)}, \setminus I}^2 &= \alpha_A^T \Sigma_{A'} \alpha_A + \sigma_I^2 \alpha_I^T \alpha_I \\ &\quad - (\alpha_A^T \Sigma_{A'} \beta + \sigma_I^2 \alpha_I^T) \phi (\phi^T (\beta^T \Sigma_{A'} \beta + \sigma_I^2 \mathbf{I}_I) \phi + \sigma_J^2 \mathbf{I}_J)^{-1} \phi^T (\beta^T \Sigma_{A'} \alpha_A + \sigma_I^2 \alpha_I) \end{aligned} \quad (59)$$

## References

1. Bishop, C. M. *Pattern Recognition and Machine Learning* (Springer-Verlag, Berlin, Heidelberg, 2006).
